# Supplementary material
Source: publisher site journal article supplement (https://static.cambridge.org/content/id/urn:cambridge.org:id:article:S0899823X19001557/resource/name/S0899823X19001557supp001.docx)
Supplement: Supplementary file 1 [file S0899823X19001557supp001.docx]

**Supplementary Table 1.** Comparison of Patient Characteristics between *E. coli* and *Klebsiella* spp. Hospital-Onset Bacteremia Cases and Matched Uninfected Controls

|  | **FR-/ESCR-** | | | **FR-ESCR+** | | | **FR+ESCR-** | | | **FR+ESCR+** | | |
| --- | --- | --- | --- | --- | --- | --- | --- | --- | --- | --- | --- | --- |
|  | Infected | Uninfected | p-  value | Infected | Uninfected | p-value | Infected | Uninfected | p-value | Infected | Uninfected | p-value |
| N | 4813 | 13850 | N/A | 1029 | 2916 | N/A | 202 | 574 | N/A | 816 | 2324 | N/A |
| Patient Demographics |  | | |  | | |  | | |  | | |
| Age (Mean) | 67.7 | 67.6 | 0.66 | 68.7 | 67.7 | 0.05 | 68.6 | 69.0 | 0.79 | 69.3 | 69.0 | 0.48 |
| BMI (Mean) | 26.0 | 26.6 | <0.0001 | 26.0 | 26.3 | 0.15 | 26.7 | 25.8 | 0.38 | 26.6 | 25.7 | <0.001 |
| Male Gender | 4701 | 13546 | 0.61 | 1010 | 2868 | 0.67 | 197 | 559 | 1.00 | 803 | 2288 | 1.00 |
| Charlson Comorbidities |  | | |  | | |  | | |  | | |
| HIV/AIDS | 60 | 211 | 0.18 | 17 | 47 | 0.89 | 1 | 13 | 0.13 | 17 | 58 | 0.59 |
| CVD | 735 | 3057 | <0.001 | 183 | 630 | 0.01 | 42 | 148 | 0.18 | 187 | 587 | 0.19 |
| COPD | 1234 | 5426 | <0.001 | 328 | 1118 | <0.001 | 62 | 196 | 0.39 | 228 | 841 | <0.001 |
| CHF | 1046 | 4145 | <0.001 | 289 | 910 | 0.06 | 58 | 187 | 0.33 | 256 | 712 | 0.69 |
| DM | 1744 | 5764 | <0.001 | 442 | 1229 | 0.66 | 78 | 272 | 0.03 | 372 | 1053 | 0.90 |
| Dementia | 196 | 784 | <0.001 | 65 | 149 | 0.15 | 9 | 58 | 0.01 | 74 | 209 | 0.94 |
| Hemiplegia/ Paraplegia | 246 | 707 | 1.00 | 109 | 161 | <0.001 | 27 | 38 | <0.001 | 131 | 123 | <0.001 |
| Liver Disease | 829 | 1932 | <0.001 | 209 | 413 | <0.001 | 31 | 88 | 1.00 | 158 | 345 | 0.003 |
| Malignancy without Metastasis | 1843 | 4322 | <0.001 | 385 | 927 | <0.01 | 57 | 188 | 0.03 | 226 | 830 | <0.001 |
| Metastatic Tumor | 669 | 1340 | <0.001 | 109 | 291 | 0.59 | 17 | 59 | 0.49 | 63 | 245 | 0.02 |
| MI | 627 | 2129 | <0.001 | 155 | 455 | 0.73 | 38 | 115 | 0.76 | 144 | 427 | 0.67 |
| PUD | 294 | 811 | 0.52 | 52 | 164 | 0.52 | 12 | 36 | 1.00 | 63 | 148 | 0.19 |
| PVD | 674 | 3298 | <0.001 | 161 | 665 | <0.001 | 49 | 156 | 0.46 | 146 | 613 | <0.001 |
| Renal Disease | 1069 | 3403 | <0.001 | 296 | 746 | 0.05 | 56 | 166 | 0.79 | 283 | 629 | <0.001 |
| Rheumatic Disease | 110 | 387 | 0.06 | 32 | 76 | 0.44 | 3 | 18 | 0.31 | 21 | 56 | 0.79 |

FR: Fluoroquinolone Resistance, ESCR: Extended Spectrum Cephalosporin Resistance, BMI: Body Mass Index, N/A: Not Applicable, HIV: Human Immunodeficiency Virus, AIDS: Acquired Immune Deficiency Syndrome, CVD: Cerebrovascular Disease, COPD: Chronic Obstructive Pulmonary Disease, CHF: Congestive Heart Failure, DM: Diabetes Mellitus, MI: Myocardial Infarction, PUD: Peptic Ulcer Disease, PVD: Peripheral Vascular Disease
